# Supplementary material for: Middle ear mucosal regeneration by tissue-engineered cell sheet transplantation
Source: PubMed Central journal article supplement (PMC5665617; doi:10.1038/s41536-017-0010-7), 2017-03-24

# Supplementary Figure 1

**Case 2**

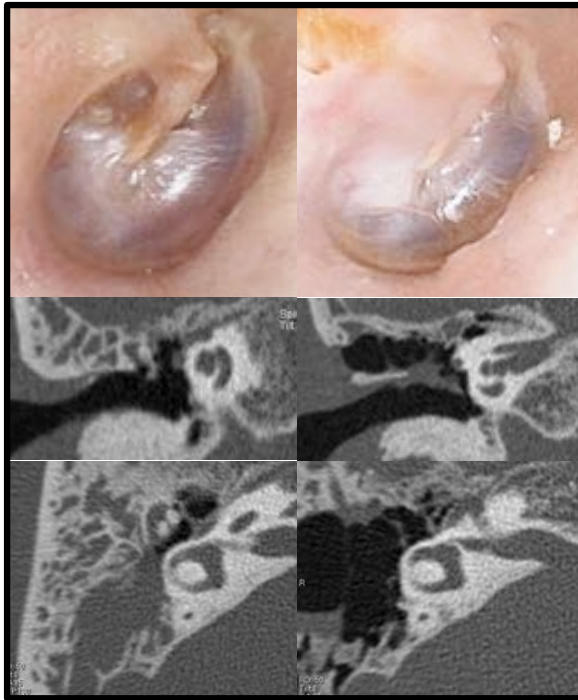

**Case 3**

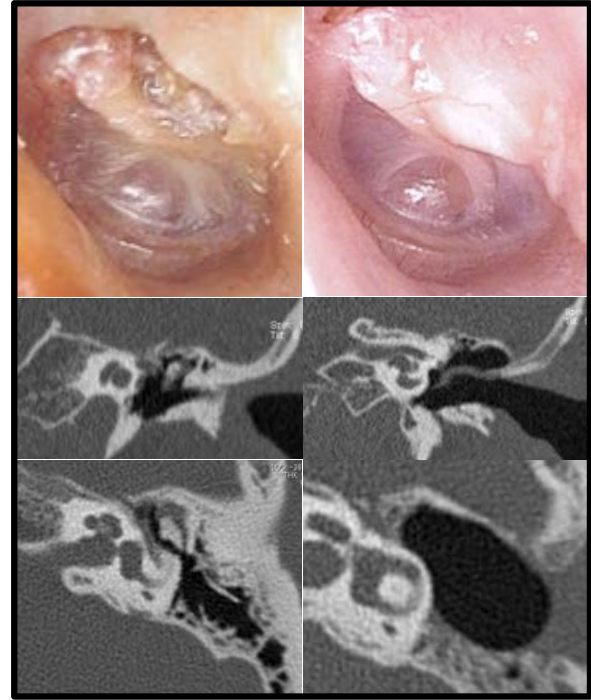

**Case 4**

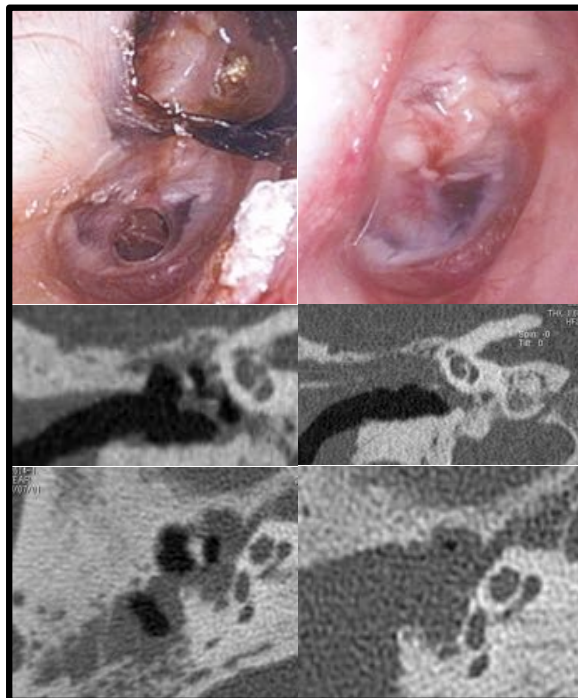

**Case 5**

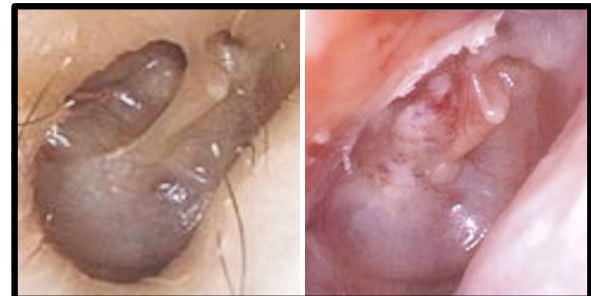

Supplement: 41536_2017_10_MOESM1_ESM.pdf [file 41536_2017_10_MOESM1_ESM.pdf]
